# Supplementary figures and images for: DBT is a metabolic switch for maintenance of proteostasis under proteasomal impairment
Source: eLife journal article supplement (doi:10.7554/elife.91002), 2023-11-01

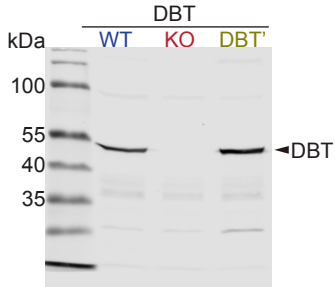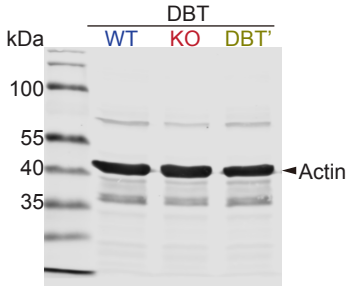

Supplement: fig1-data1 [file Figure_1C_uncropped.pdf › Figure 1 - Source data 1/Figure_1C_uncropped.pdf]

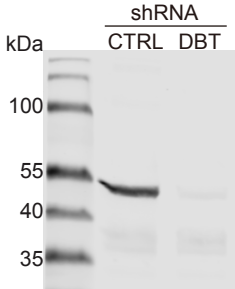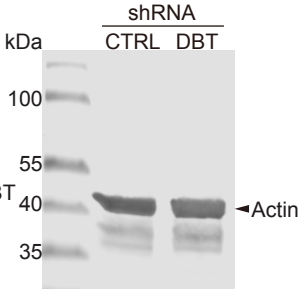

Supplement: fig1-data2 [file Figure_1F_uncropped.pdf › Figure 1 - Source data 2/Figure_1F_uncropped.pdf]

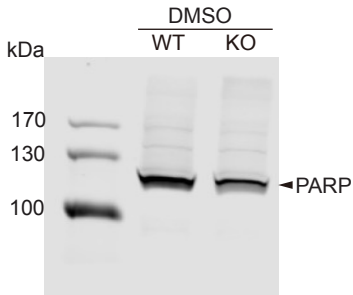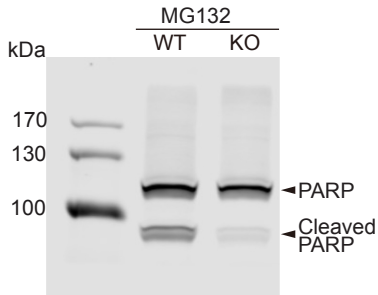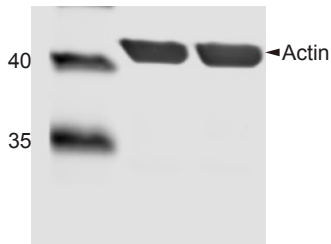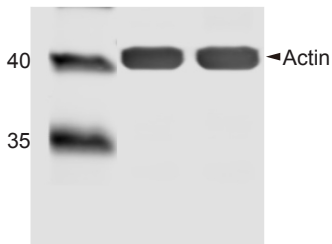

Supplement: fig1-data3 [file Figure_1G_uncropped.pdf › Figure 1 - Source data 3/Figure_1G_uncropped.pdf]

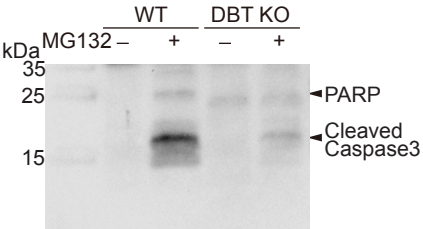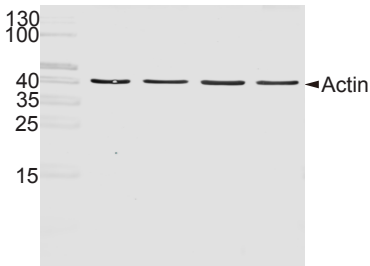

Supplement: fig1-data4 [file Figure_1H_uncropped.pdf › Figure 1 - Source data 4/Figure_1H_uncropped.pdf]

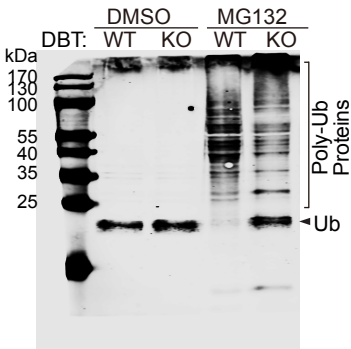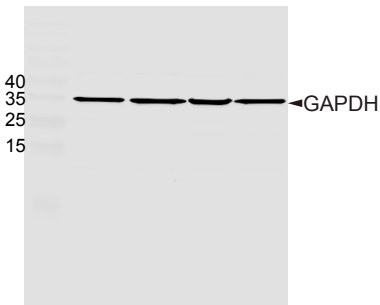

Supplement: fig2-data1 [file Figure_2A_uncropped.pdf › Figure 2 - Source data 1/Figure_2A_uncropped.pdf]

# MG132

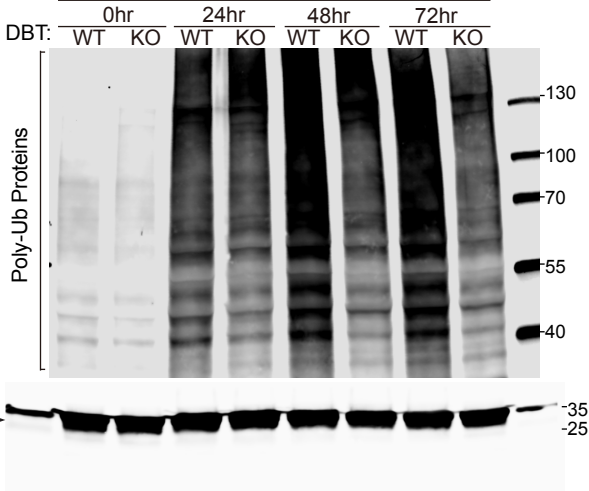

Supplement: fig2-figsupp1-data1 [file Figure 2 - Figure supplement1A_uncropped.pdf › Figure 2 - Figure supplement1 - Source data 1/Figure 2 - Figure supplement1A_uncropped.pdf]

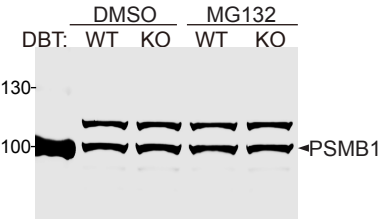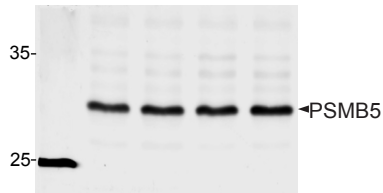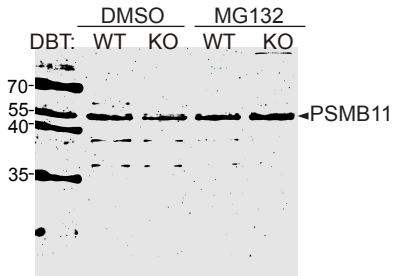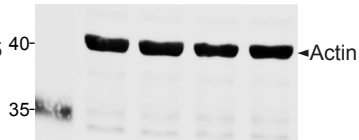

Supplement: fig2-figsupp1-data2 [file Figure 2 - Figure supplement1C_uncropped.pdf › Figure 2 - Figure supplement1 - Source data 2/Figure 2 - Figure supplement1C_uncropped.pdf]

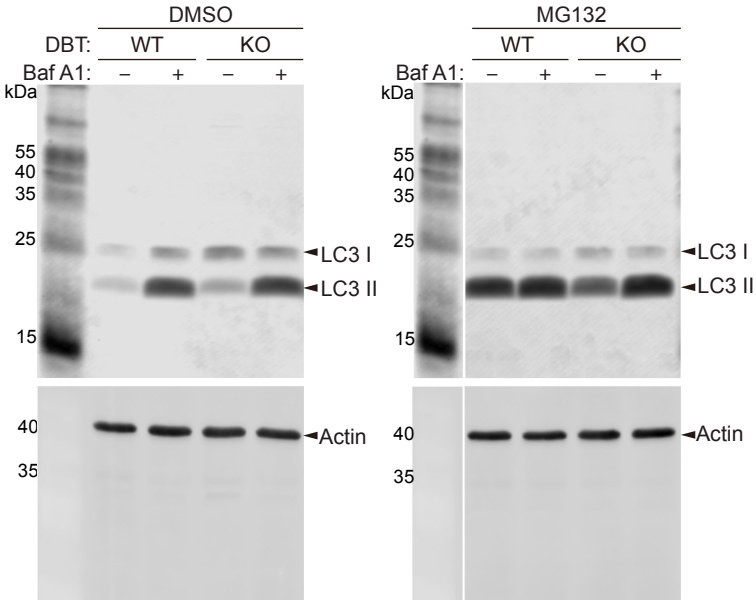

Supplement: fig3-data1 [file Figure_3A_uncropped.pdf › Figure 3 - Source data 1/Figure_3A_uncropped.pdf]

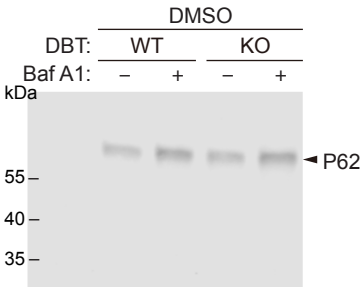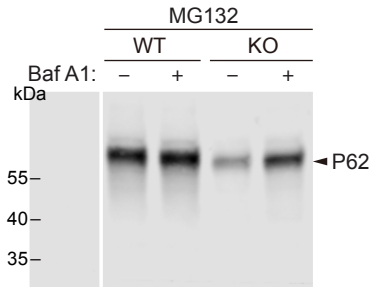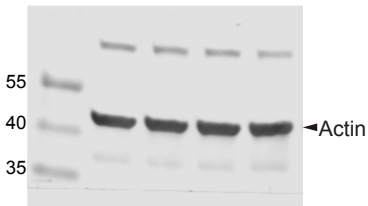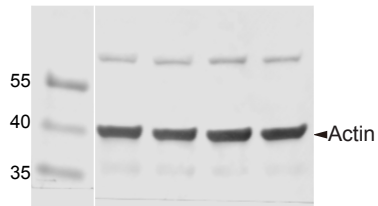

Supplement: fig3-data2 [file Figure_3D_uncropped.pdf › Figure 3 - Source data 2/Figure_3D_uncropped.pdf]

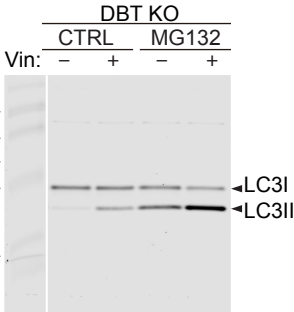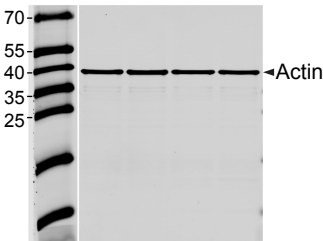

Supplement: fig3-figsupp1-data1 [file Figure 3 - Figure supplement1A_uncropped.pdf › Figure 3 - Figure supplement1 - Source data 1/Figure 3 - Figure supplement1A_uncropped.pdf]

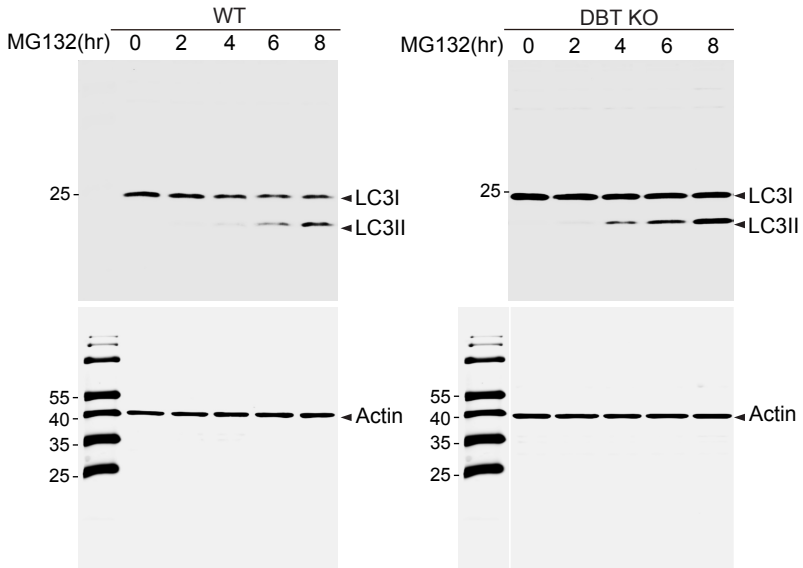

Supplement: fig3-figsupp1-data2 [file Figure 3 - Figure supplement1B_uncropped.pdf › Figure 3 - Figure supplement1 - Source data 2/Figure 3 - Figure supplement1B_uncropped.pdf]

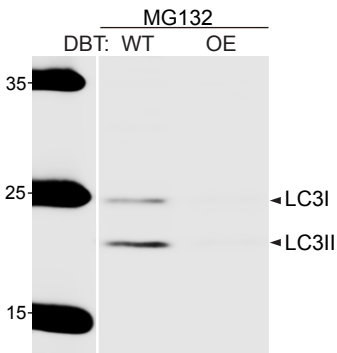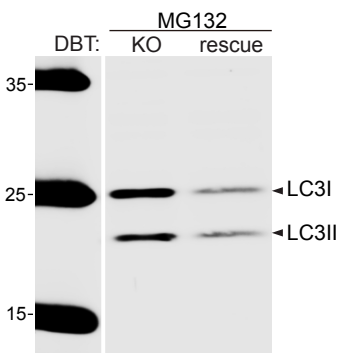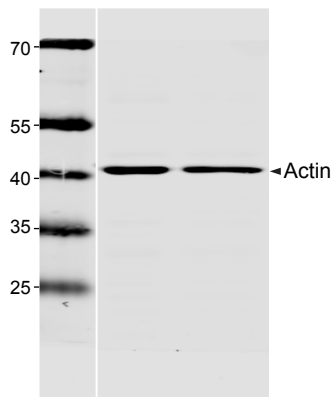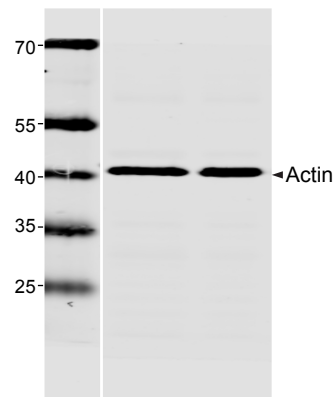

Supplement: fig3-figsupp1-data3 [file Figure 3 - Figure supplement1D_uncropped.pdf › Figure 3 - Figure supplement1 - Source data 3/Figure 3 - Figure supplement1D_uncropped.pdf]

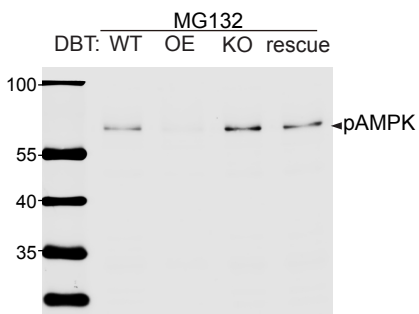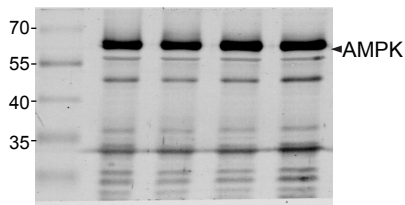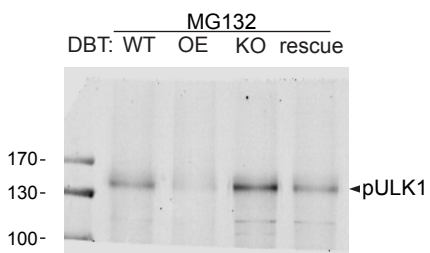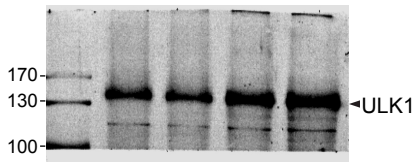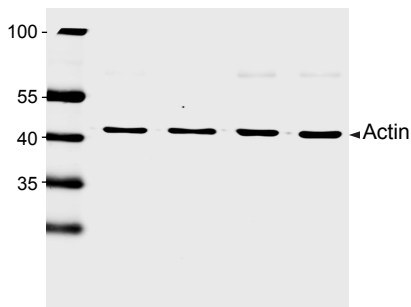

Supplement: fig3-figsupp1-data4 [file Figure 3 - Figure supplement1E_uncropped.pdf › Figure 3 - Figure supplement1 - Source data 4/Figure 3 - Figure supplement1E_uncropped.pdf]

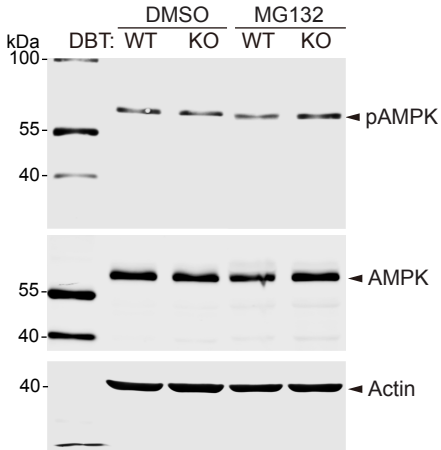

Supplement: fig4-data1 [file Figure_4C_uncropped.pdf › Figure 4 - Source data 1/Figure_4C_uncropped.pdf]

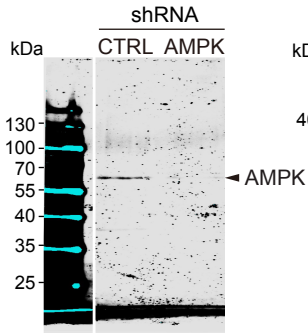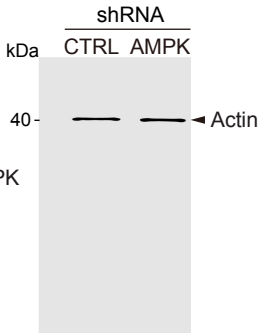

Supplement: fig4-data2 [file Figure_4D_uncropped.pdf › Figure 4 - Source data 2/Figure_4D_uncropped.pdf]

| MG132   |      |   |      |   |
|---------|------|---|------|---|
| shRNA:  | CTRL |   | AMPK |   |
| Baf A1: | -    | + | -    | + |

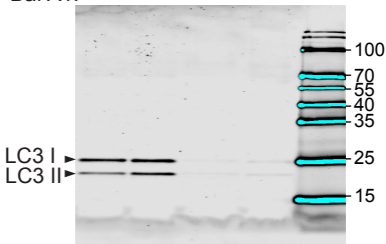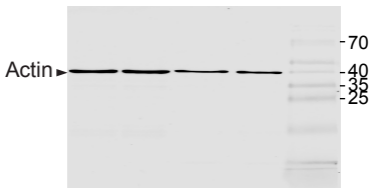

Supplement: fig5-data1 [file Figure_5A_uncropped.pdf › Figure 5 - Source data 1/Figure_5A_uncropped.pdf]

DMSO

DBT: WT KO

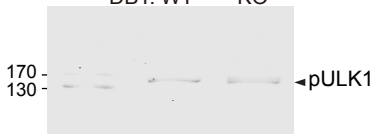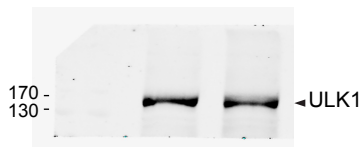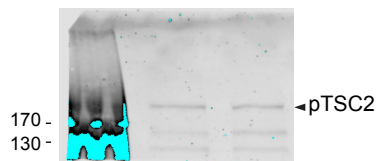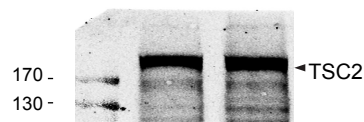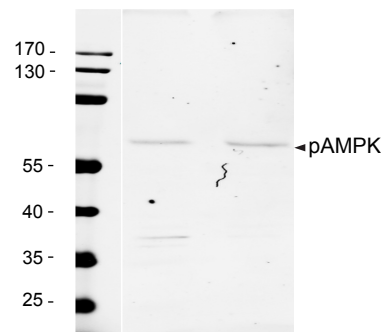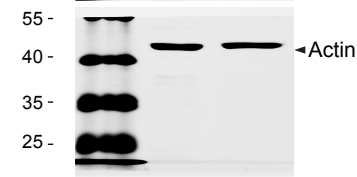

MG132

DBT: WT KO

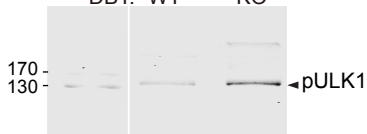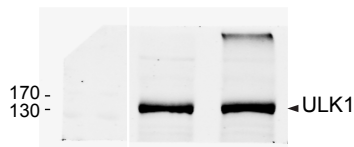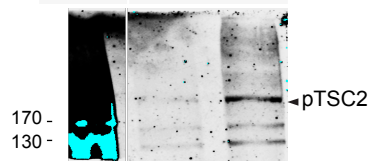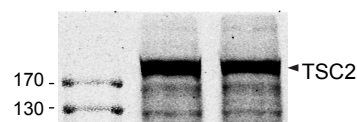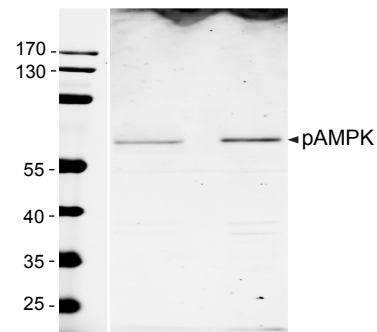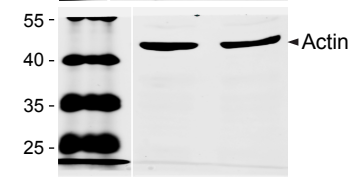

Supplement: fig5-data2 [file Figure_5B_uncropped.pdf › Figure 5 - Source data 2/Figure_5B_uncropped.pdf]

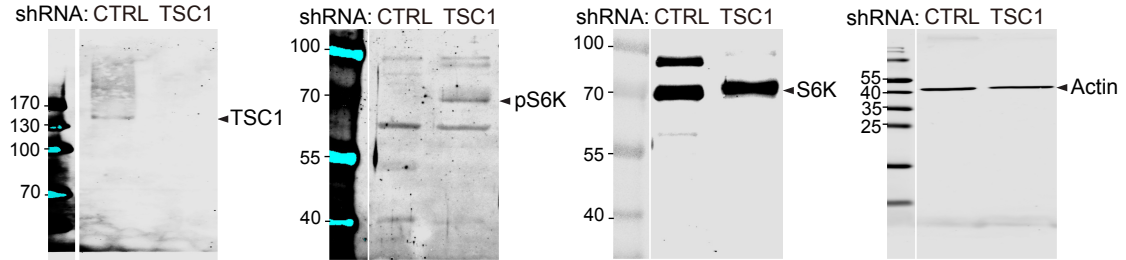

Supplement: fig5-data3 [file Figure_5C_uncropped.pdf › Figure 5 - Source data 3/Figure_5C_uncropped.pdf]

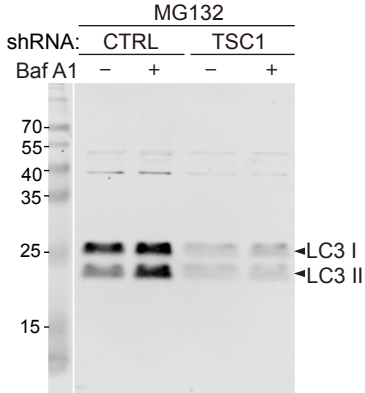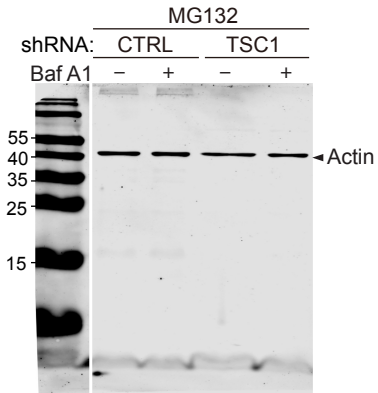

Supplement: fig5-data4 [file Figure_5D_uncropped.pdf › Figure 5 - Source data 4/Figure_5D_uncropped.pdf]

VEH      Comp.C

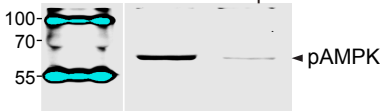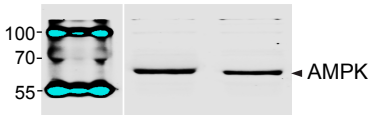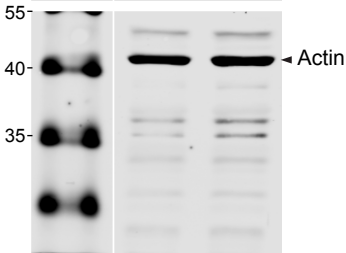

Supplement: fig5-figsupp1-data1 [file Figure 5 - Figure supplement1A_uncropped.pdf › Figure 5 - Figure supplement1 - Source data 1/Figure 5 - Figure supplement1A_uncropped.pdf]

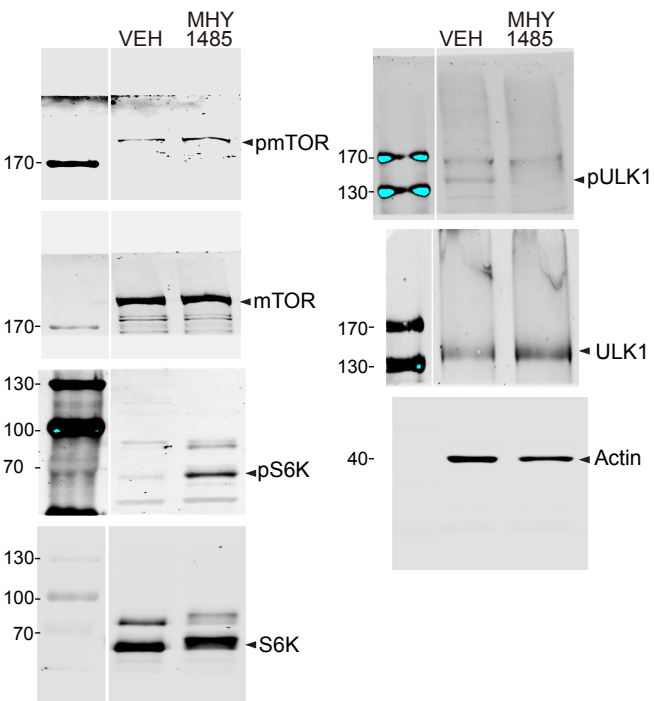

Supplement: fig5-figsupp1-data2 [file Figure 5 - Figure supplement1E_uncropped.pdf › Figure 5 - Figure supplement1 - Source data 2/Figure 5 - Figure supplement1E_uncropped.pdf]

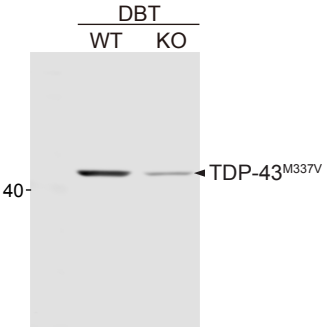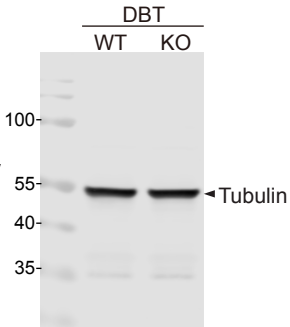

Supplement: fig6-data1 [file Figure_6C_uncropped.pdf › Figure 6 - Source data 1/Figure_6C_uncropped.pdf]

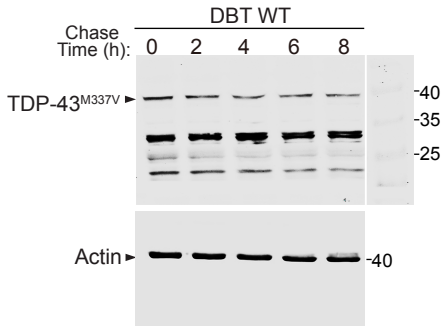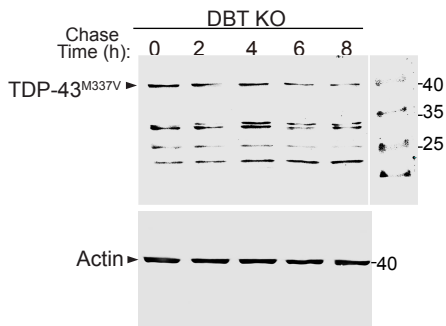

Supplement: fig6-data2 [file Figure_6D_uncropped.pdf › Figure 6 - Source data 2/Figure_6D_uncropped.pdf]

|        |  | myc-TDP-43 <sup>M337V</sup> |   |    |   |
|--------|--|-----------------------------|---|----|---|
| DBT:   |  | WT                          |   | KO |   |
| Baf A1 |  | -                           | + | -  | + |

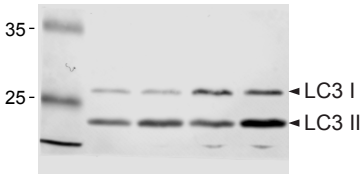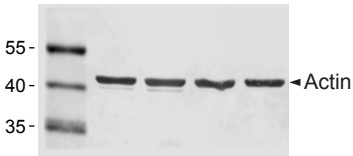

Supplement: fig6-data3 [file Figure_6E_uncropped.pdf › Figure 6 - Source data 3/Figure_6E_uncropped.pdf]

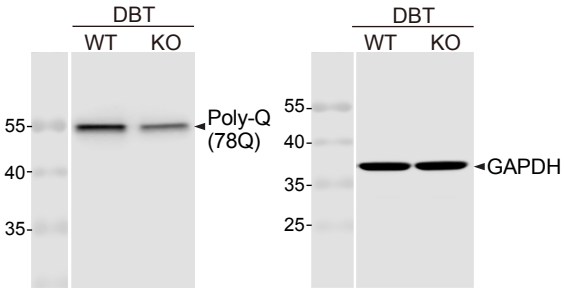

Supplement: fig6-figsupp1-data1 [file Figure 6 - Figure supplement1C_uncropped.pdf › Figure 6 - Figure supplement1 - Source data 1/Figure 6 - Figure supplement1C_uncropped.pdf]

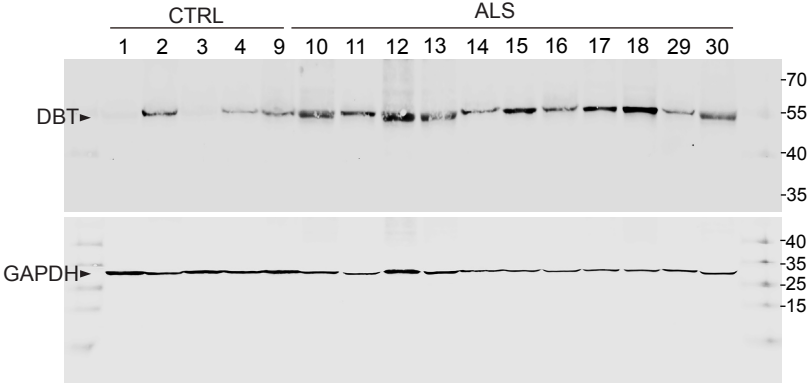

Supplement: fig7-data1 [file Figure_7A_uncropped.pdf › Figure 7 - Source data 1/Figure_7A_uncropped.pdf]

DBT : WT      KO  
TDP-43<sup>M337V</sup> : -    +    -    +

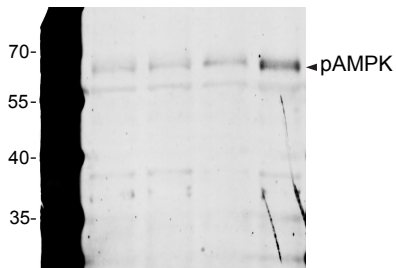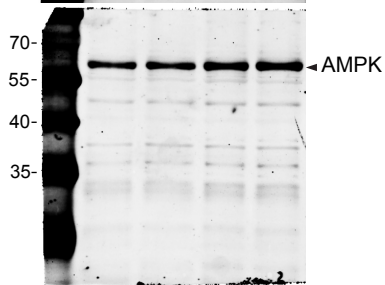

DBT : WT      KO  
TDP-43<sup>M337V</sup> : -    +    -    +

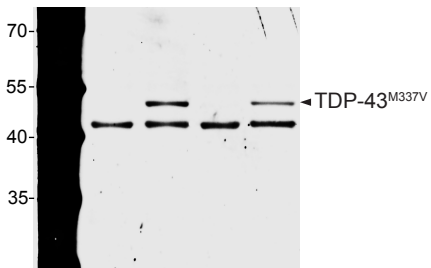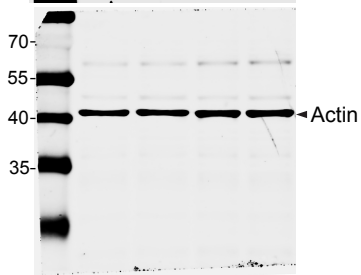

Supplement: fig7-figsupp1-data1 [file Figure 7 - Figure supplement1A_uncropped.pdf › Figure 7 - Figure supplement1 - Source data 1/Figure 7 - Figure supplement1A_uncropped.pdf]

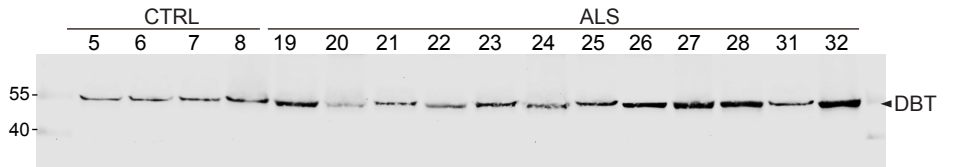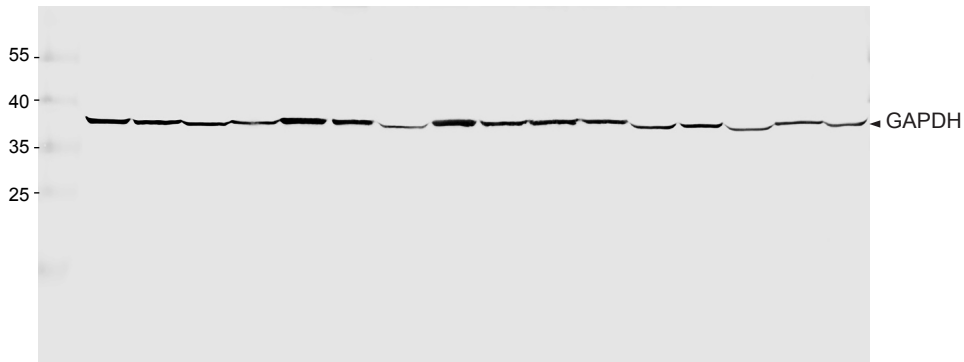

Supplement: fig7-figsupp1-data2 [file Figure 7 - Figure supplement1B_uncropped.pdf › Figure 7 - Figure supplement1 - Source data 2/Figure 7 - Figure supplement1B_uncropped.pdf]
